# Supplementary material
Source: MDPI journal article supplement (https://www.mdpi.com/2073-4433/11/12/1320)
Supplement: s1 [file s1]

Supplementary

# A Landscape Study of Sediment Formation and Transport in the Urban Environment

Ilia Yarmoshenko \*, Georgy Malinovsky, Elena Baglaeva and Andrian Seleznev

Institute of Industrial Ecology UB RAS, 620219, Ekaterinburg, Russia; georgy@ecko.uran.ru (G.M.); sem@ecko.uran.ru (E.B.); sandrian@rambler.ru (A.S.)

\* Correspondence: ivy@ecko.uran.ru

Received: 27 October 2020; Accepted: 1 December 2020; Published: date

Field pictures demonstrating examples of urban landscape characteristics.

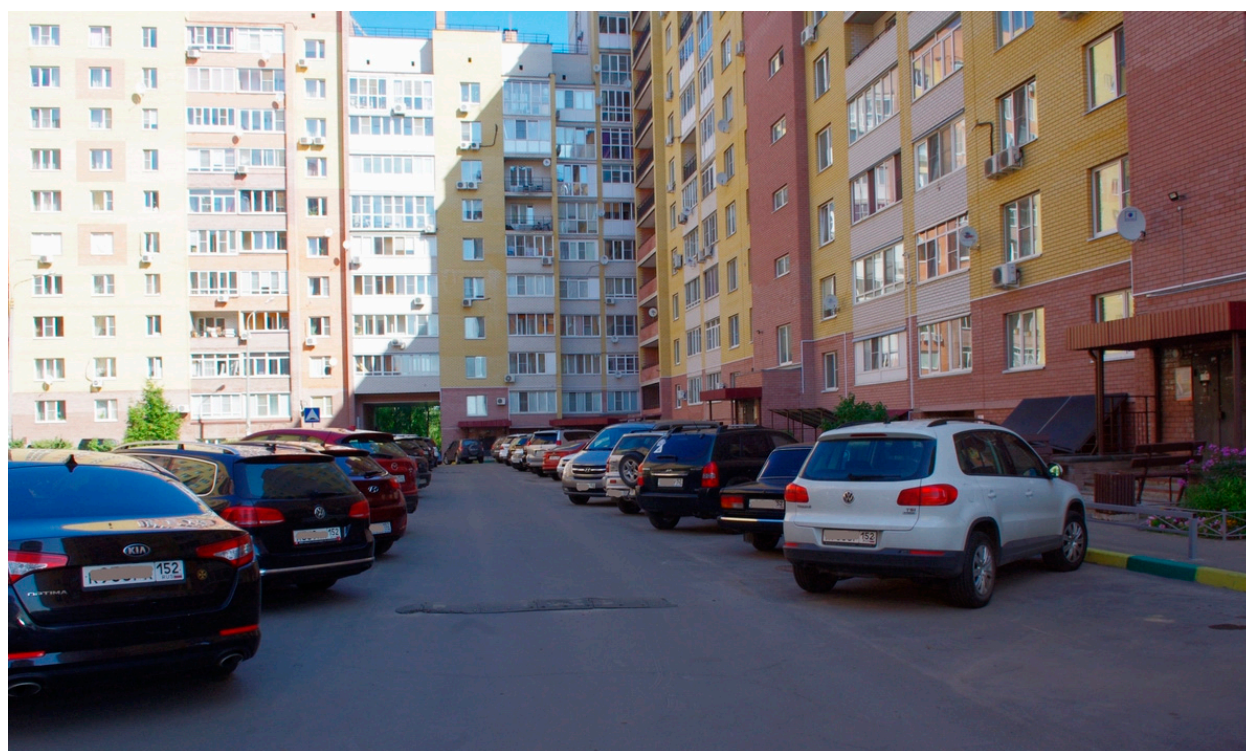

**Figure S1.** Example of a vehicle zone (all photos were taken during the field survey).

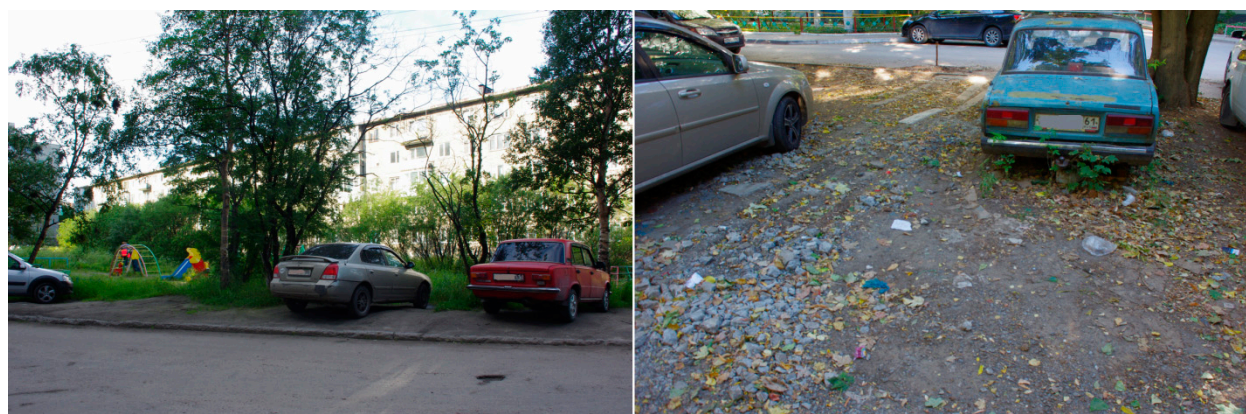

**Figure S2.** Examples of illegal parking on lawns and playgrounds.



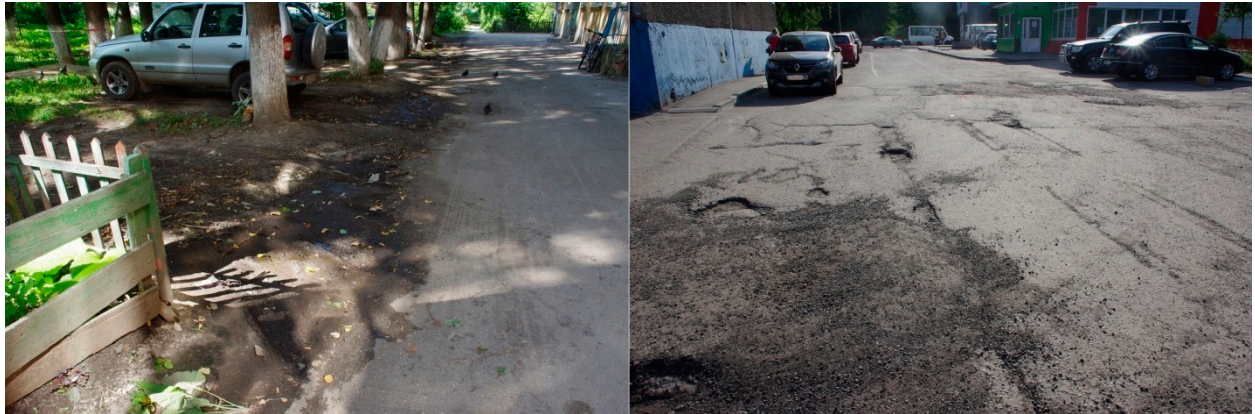

**Figure S3.** Examples of disturbed cover from illegal parking (left) and damaged driveway (right).

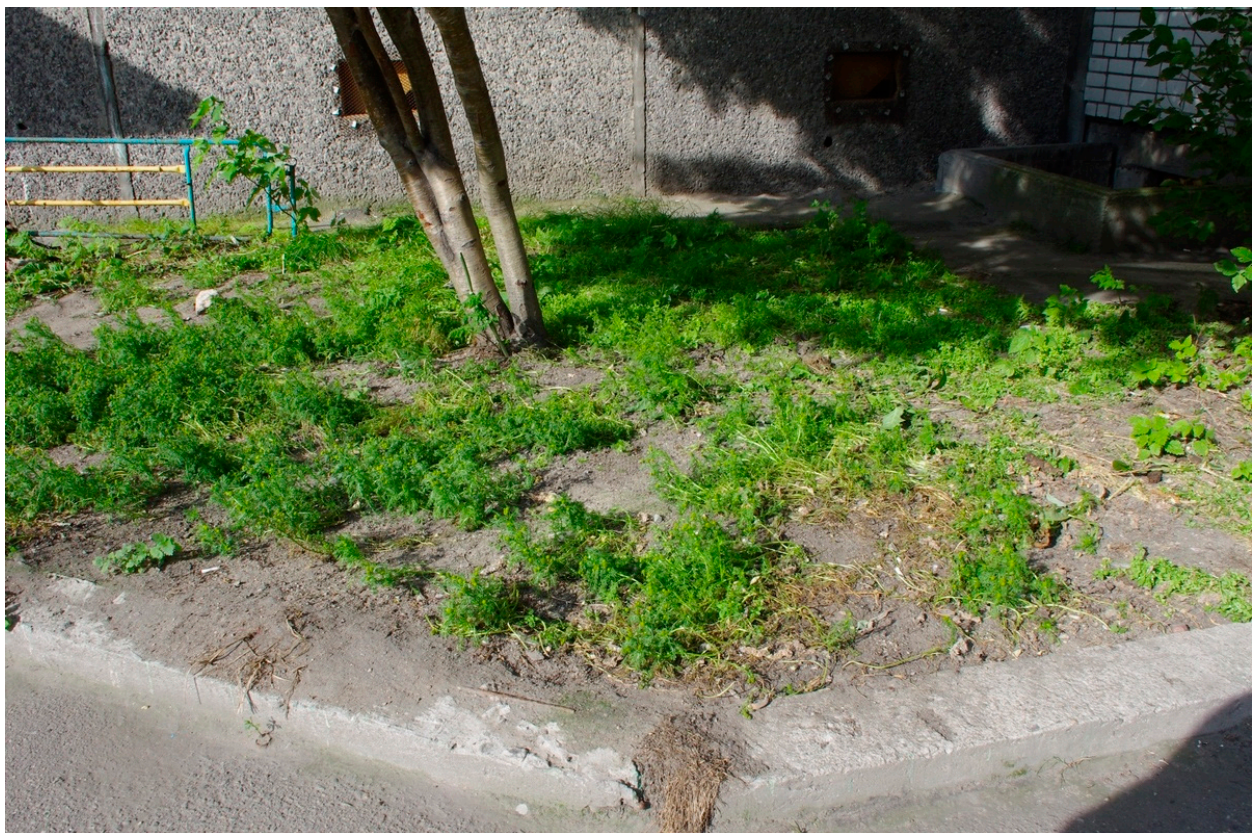

**Figure S4.** Example of low grass projective cover.

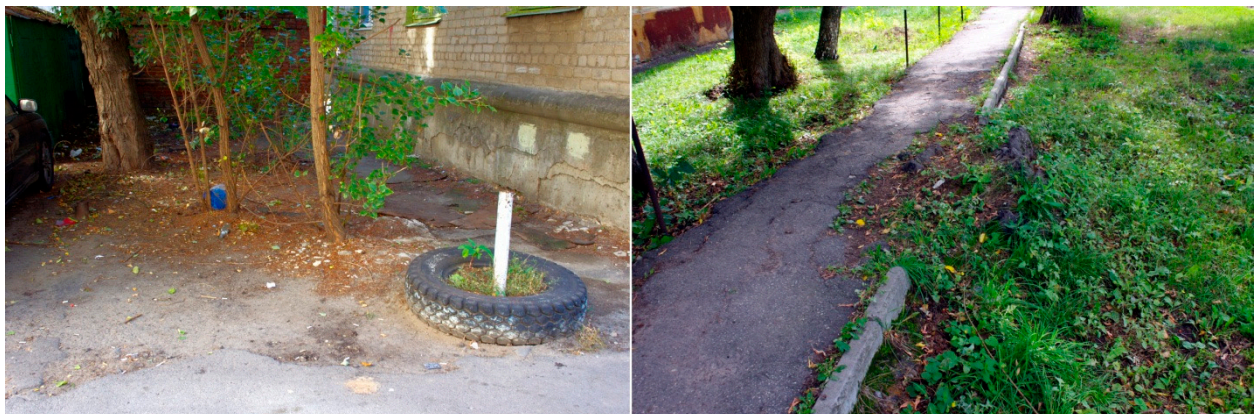



**Figure S5.** Examples of segments with negative grades of cleaning (left) and technical condition (right).

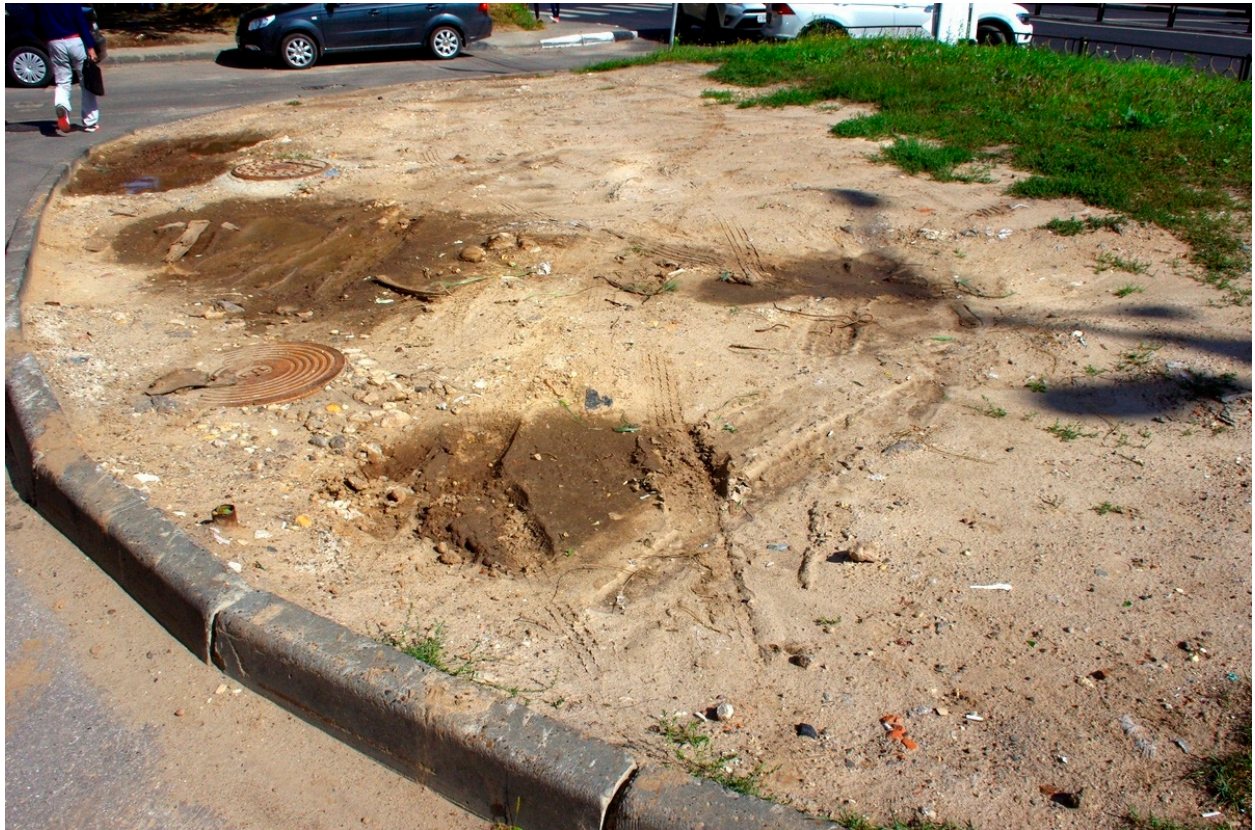

**Figure S6.** Example of delayed restoration after earthwork.
